# Supplementary material for: Origins of concentration gradients for diffusiophoresis
Source: Royal Society of Chemistry journal article supplement (doi:10.1039/c6sm00052e), 2016-01-01
Supplement: c6sm00052e1.pdf [file c6sm00052e1.pdf]

## Origins of concentration gradients for diffusiophoresis

Darrell Velegol\*, Astha Garg<sup>a</sup>, Rajarshi Guha<sup>a</sup>, Abhishek Kar, Manish Kumar

Penn State University, Department of Chemical Engineering, University Park, PA 16802, U.S.A

<sup>a</sup>The authors contributed equally to this work

\* To whom correspondence should be addressed: 108 Fenske Laboratory, The Pennsylvania State University, University Park, PA 16802. Phone: (814) 865-8739. Fax: (814) 865-7846. Email: [velegol@psu.edu](mailto:velegol@psu.edu)

### Supplementary Information

#### Scaling Analysis in Electrolyte Diffusiophoresis:

Defining Notations: 1 => solute, 2 => solvent;  $N_1$  => no. of solute moles and  $N_2$  => no. of solvent moles

$$U = \left( \frac{\epsilon KT}{\eta Z e} \beta \zeta_p \right) \frac{\nabla C_1}{C_1} = \frac{\frac{\nabla C_1}{C_1}}{\frac{\epsilon KT}{\eta Z e} \beta \zeta_p} = \gamma \nabla(\log C_1)$$

Diffusiophoretic velocity (U):

Assumptions: 1. Very dilute system in terms of salt ( $N_1$  is negligible), 2. Ideal solution (activity co-eff.,  $\gamma_1$  &  $\gamma_2 \sim 1.0$ ), 3. Constant temperature and pressure, 4.  $N_2$  is invariant over space (1-dimensional), 5. z-directional or mono directional diffusion of solute.

Chemical potential of solute:  $\mu_1 = \mu_1^0 + RT \log(\gamma_1 C_1)$

Applying grad. on both sides of the above equation-

$$\nabla \mu_1 = \nabla \mu_1^0 + RT \nabla(\log \gamma_1 + \log C_1)$$

$\nabla \mu_1^0 = 0$  ; standard (reference) chemical potential does not vary over space

$\nabla \log \gamma_1 = 0$ ; ideal solution

The above equation simplifies to-  $\nabla \mu_1 = RT \nabla \log C_1$

Now combining the diffusiophoretic velocity equation-

$$U = \frac{\gamma}{RT} \nabla \mu_1 \quad (1)$$

Therefore, diffusiophoresis is driven by change in chemical potential with resistance equivalent to  $\frac{RT}{\gamma}$

Total Gibbs free energy of the system:  $G = \mu_1 N_1 + \mu_2 N_2$

Applying grad. on both sides of the above equation-

$$\nabla G = \mu_1 \nabla N_1 + N_1 \nabla \mu_1 + \mu_2 \nabla N_2 + N_2 \nabla \mu_2$$

$\mu_2 \nabla N_2 \approx 0$ ;  $N_2$  is space invariant in dilute solution

$N_2 \nabla \mu_2 \approx 0$ ;  $\nabla \mu_2 \approx 0$  as  $\nabla \mu_2 = \nabla \mu_2^0 + RT \nabla (\log \gamma_2 + \log C_2)$  ... where  $\nabla \mu_2^0 = 0$ ,  $\nabla \log \gamma_2 = 0$  and  $\nabla \log C_2 \approx 0$ , because  $C_2$  is almost invariant over space

$N_1 \nabla \mu_1 \approx 0$ ; since for a very dilute system  $N_1$  becomes negligible

Therefore, simplification of the above equation in the limit of "extreme dilution"-

$$\begin{aligned} \nabla G &= \mu_1 \nabla N_1 \\ \Rightarrow \mu_1 &= \frac{\nabla G}{\nabla N_1} \\ \Rightarrow \nabla \mu_1 &= \nabla \left( \frac{\nabla G}{\nabla N_1} \right) \\ &= \frac{\frac{\partial G}{\partial z}}{\frac{\partial N_1}{\partial z}} \\ \Rightarrow \nabla \mu_1 &= \nabla \left( \frac{\partial G}{\partial N_1} \right) \end{aligned}$$

From Equation (1), substituting  $\nabla \mu_1$ , we can write-

$$U = \frac{\gamma}{RT} \nabla \mu_1 = \frac{\gamma}{RT} \nabla \left( \frac{\partial G}{\partial N_1} \right) = \gamma \nabla \left( \frac{\partial G}{\partial (N_1 RT)} \right) = \gamma \nabla \left( \frac{\partial G/V}{\partial (N_1 RT/V)} \right) = \gamma \nabla \left( \frac{\partial \bar{G}}{\partial \pi} \right)$$

Therefore, for a dilute system (with volume V) -

$$U = \gamma \lim_{N_1 \rightarrow 0} \nabla \left( \frac{\partial \bar{G}}{\partial \pi} \right) \quad (2)$$

$\bar{G}$  is the volume specific Gibbs free energy (J/m<sup>3</sup>),  $\pi$  is the osmotic pressure imparted by solute (Pa) and  $\gamma$  is “diffusiophoretic diffusivity”

Equation (2) can be approximated as follows for a dilute system-

$$U \approx \gamma \frac{\left( \frac{\Delta \bar{G}}{\Delta \pi} \right)}{L} \quad (3)$$

L is characteristic length scale of the system. For reverse osmosis membrane systems processing 10 mM NaCl feed with system volume 1 L-

$$N_1 = 0.01$$

$$N_2 = 55.56$$

Mole fractions,  $x_1 = 0.00018$  and  $x_2 = 0.00082$

$$\Delta G_{mix} = (N_1 + N_2) RT (x_1 \log(x_1) + x_2 \log(x_2))$$

$$\frac{\Delta G_{mix}^-}{\Delta \pi} = \frac{(N_1 + N_2) RT (x_1 \log(x_1) + x_2 \log(x_2)) / V}{N_1 RT / V} \approx -10$$

For  $U \sim O(10^{-6})$  m/s and  $\gamma \sim O(10^{-10})$  m<sup>2</sup>/s,  $L \sim 1$  mm which is reasonable as of the order of concentration boundary layer.

Diffusiophoretic transport can be significant across or along a surface, particularly if the surface is porous or semipermeable and obstructs free diffusion. In such a system, analogous to diffusion co-efficient,

we can define a “diffusiophoretic co-efficient” as  $\sigma_p = \lim_{N_{solute} \rightarrow 0} \nabla(\partial \bar{G} / \partial \pi)$  for dilute solutions ( $N_{solute} \rightarrow 0$ ),

where  $\pi$  signifies the osmotic pressure exerted by solutes. This terminology resembles Kedem-Katchalsky reflection co-efficient  $\sigma_m = (\partial P / \partial \pi)_{J_v = 0}$  which quantifies the intrinsic semipermeability of membranes<sup>1</sup>.

Diffusiophoretic velocity ( $U_{dp}$ ) at lower solute concentrations, in terms of salt gradients generated electrophoresis, can be expressed analogous to Fickian diffusive flux as follows-

$$U_{dp} = \left( \frac{\epsilon_m K T}{\eta Z e} \beta \zeta_p \lim_{N_{solute} \rightarrow 0} \nabla \left( \frac{\partial \bar{G}}{\partial \pi} \right) \right) = \gamma \sigma_p \quad (4)$$

Where,  $\gamma$  has similar units and the same order of magnitude values as diffusion coefficient of salts. The above expression elucidates that diffusiophoresis can be exacerbated in cases where spatial variation of volumetric Gibbs free energy ( $\bar{G}$ ) is higher, such as in concentration boundary layers and deposited particulate layers such as those on salt rejecting membranes, in protein transport through micropores, and in deposited gel layers on ultrafiltration membranes. If applied pressure is just able to resist osmotic pressure of solute on membrane, transport across membrane ceases and  $\sigma_m$  becomes 1 which is the case of ideal semi-permeable membrane. Similarly, diffusiophoresis ceases only when volumetric Gibbs free energy does not change spatially, ratio of local volumetric Gibbs free energy to osmotic pressure changes remains constant over space or local osmotic pressure change becomes exceedingly dominant over volumetric Gibbs free energy change. In all these cases,  $\sigma_p$  becomes 0.

## References

- 1 M. Kargol and a. Kargol, *Biophys. Chem.*, 2003, **103**, 117–127.
